# Supplementary material for: Bystander activation of irrelevant CD4+ T cells following antigen-specific vaccination occurs in the presence and absence of adjuvant
Source: PubMed Central journal article supplement (PMC5425230; doi:10.1371/journal.pone.0177365), 2017-05-10
Supplement: pone.0177365.s002.pdf [file pone.0177365.s002.pdf]

**Table S1 No cross-reactivity of hPG-specific CD4<sup>+</sup> T cells with OVA or mycobacterial-antigens**

| $\Delta\%Ki67$ expression (medium subtracted) |                    |                     |                    |                     |                      |                    |                     |                    |                     |
|-----------------------------------------------|--------------------|---------------------|--------------------|---------------------|----------------------|--------------------|---------------------|--------------------|---------------------|
|                                               | OVA                |                     | Mtb                |                     | conA                 | hPG peptide        |                     | B29 peptide        |                     |
|                                               | 2 $\mu\text{g/ml}$ | 20 $\mu\text{g/ml}$ | 2 $\mu\text{g/ml}$ | 20 $\mu\text{g/ml}$ | 2.5 $\mu\text{g/ml}$ | 2 $\mu\text{g/ml}$ | 20 $\mu\text{g/ml}$ | 2 $\mu\text{g/ml}$ | 20 $\mu\text{g/ml}$ |
| TCR-5/4E8                                     | 0                  | 1                   | 2                  | 7                   | 68                   | 73                 | 75                  | 0                  | 2                   |
| mB29b-TCR                                     | 0                  | 0                   | 3                  | 7                   | 70                   | 0                  | 0                   | 78                 | 43                  |
| Balb/c WT                                     | 2                  | 4                   | 4                  | 8                   | 48                   | 1                  | 0                   | 2                  | 4                   |
