# Supplementary material for: Bystander activation of irrelevant CD4+ T cells following antigen-specific vaccination occurs in the presence and absence of adjuvant
Source: PubMed Central journal article supplement (PMC5425230; doi:10.1371/journal.pone.0177365), 2017-05-10
Supplement: pone.0177365.s003.pdf [file pone.0177365.s003.pdf]

**Table S2 IL-2 induced hPG-specific CD4<sup>+</sup> T cell proliferation**

| $\Delta\%Ki67$ expression (medium subtracted) |        |         |
|-----------------------------------------------|--------|---------|
|                                               | IL2    |         |
|                                               | 20U/ml | 100U/ml |
| TCR-5/4E8                                     | 7      | 4       |
| mB29b-TCR                                     | 7      | 3       |
| Balb/c WT                                     | 11     | 10      |
